# Supplementary material for: Mesoporous silica nanoparticles incorporating squaraine-based photosensitizers: a combined experimental and computational approach
Source: Royal Society of Chemistry journal article supplement (doi:10.1039/c7dt03735j), 2017-10-31
Supplement: c7dt03735j1.pdf [file c7dt03735j1.pdf]

## Electronic Supplementary Information

### Mesoporous silica nanoparticles incorporating squaraine-based photosensitizers: a combined experimental and computational approach

Ivana Miletto,<sup>\*a</sup> Alberto Fraccarollo,<sup>a</sup> Nadia Barbero,<sup>b</sup> Claudia Barolo,<sup>b</sup> Maurizio Cossi,<sup>a</sup> Leonardo Marchese,<sup>a</sup> and Enrica Gianotti<sup>a</sup>

- a. Dipartimento di Scienze e Innovazione Tecnologica, Università del Piemonte Orientale “Amedeo Avogadro”, Viale Teresa Michel, 11. 15100 Alessandria, Italy E-mail: ivana.miletto@uniupo.it.  
b. Dipartimento di Chimica, Università degli Studi di Torino, Via Pietro Giuria, 7. 10125 Torino, Italy.
- 

**Table S1** – Average particle size obtained by DLS

| SAMPLE    | Average diameter (nm) |
|-----------|-----------------------|
| MSNs      | 181±18                |
| Br-NH/MSN | 185±23                |
| Br-C2/MSN | 184±19                |
| Br-C4/MSN | 180±22                |

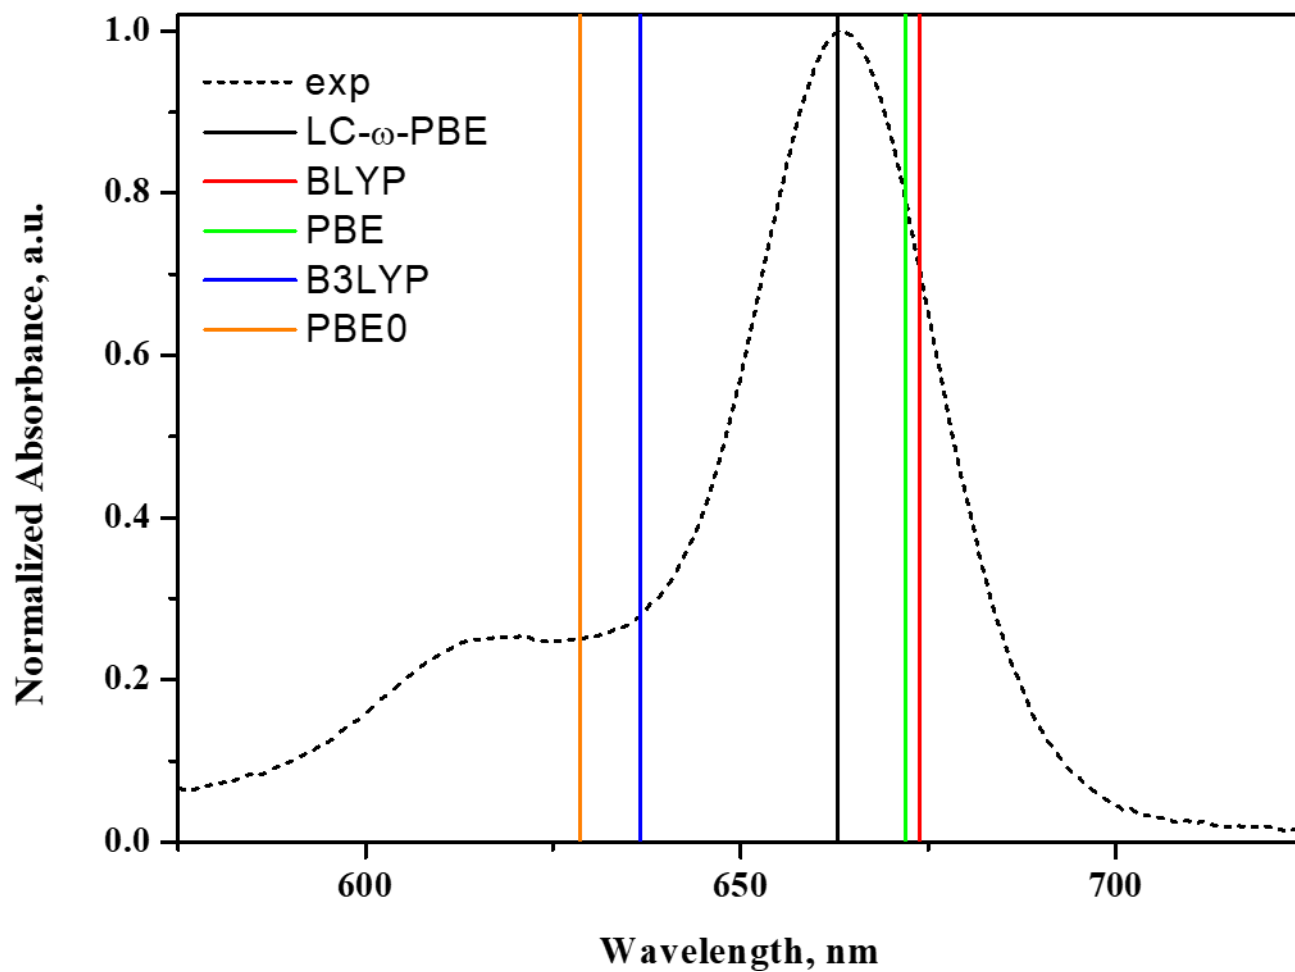

| <b>exp</b> | <b>LC-<math>\omega</math>-PBE</b> | <b>BLYP</b> | <b>PBE</b> | <b>B3LYP</b> | <b>PBE0</b> |
|------------|-----------------------------------|-------------|------------|--------------|-------------|
| 663 nm     | 663.00 nm                         | 673.92 nm   | 672.02 nm  | 636.61 nm    | 628.59 nm   |

**Figure S1** Experimental UV-Vis absorption spectrum (dashed line) and simulated UV-Vis absorption spectra calculated with different hybrid and pure functionals.

**A**

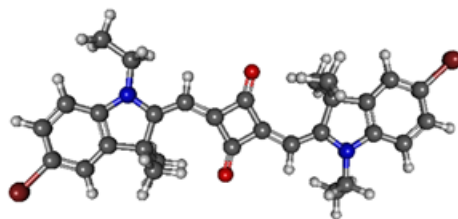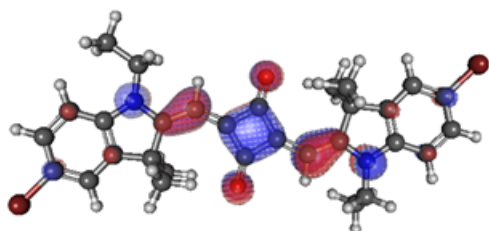

HOMO

LUMO

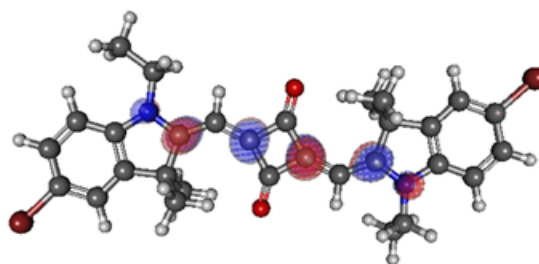

**B**

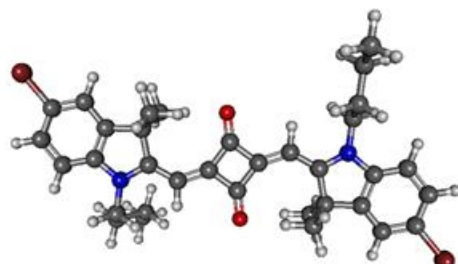

HOMO

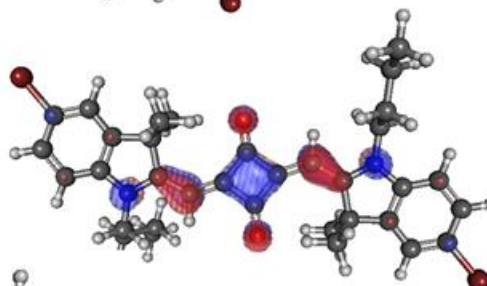

LUMO

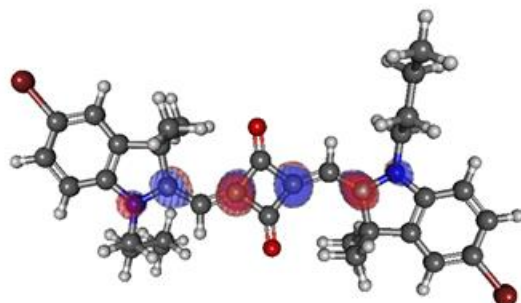

**Figure S2** Optimized structure of Br-C2 (**A**) and Br-C4 (**B**) molecules in DMF solution

**A**

HOMO

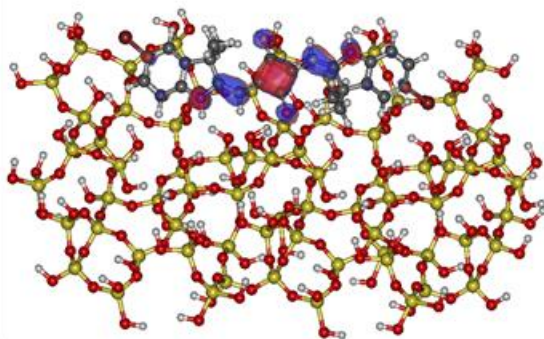

LUMO

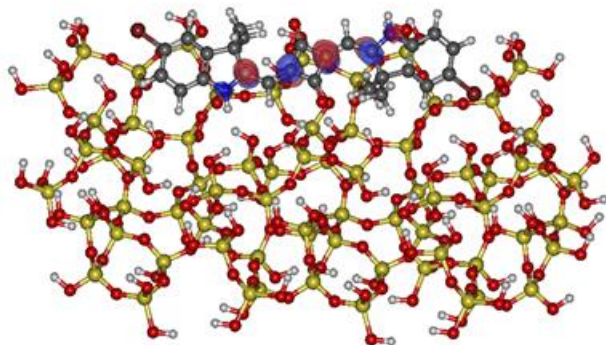

**B**

HOMO

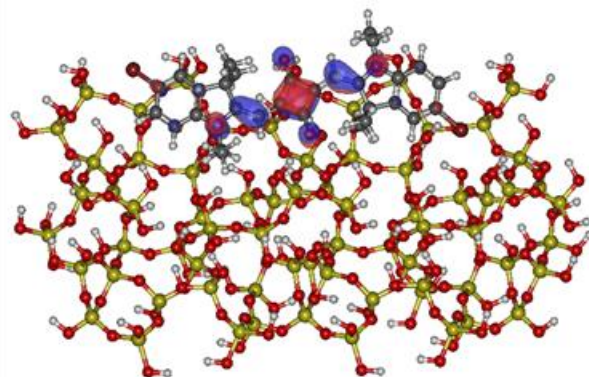

LUMO

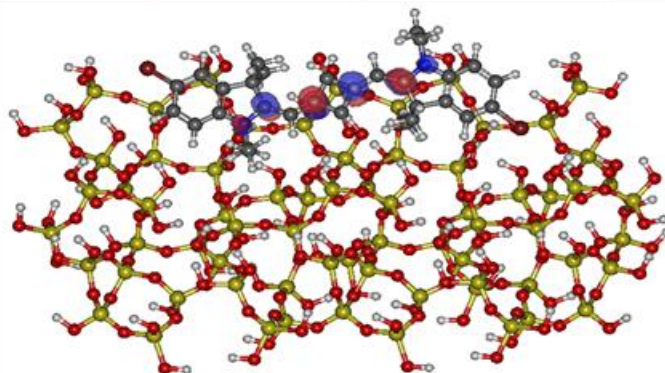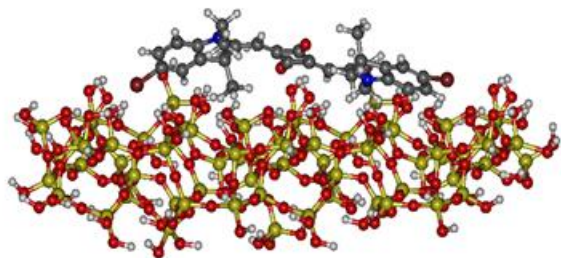

**C**

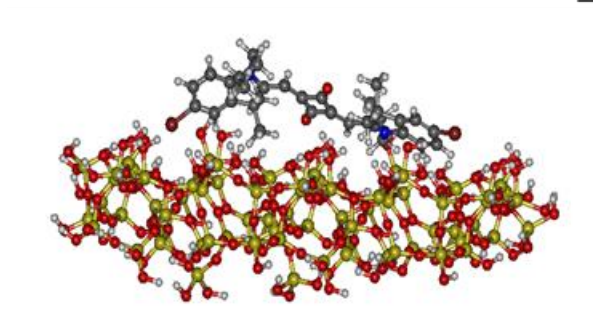

HOMO

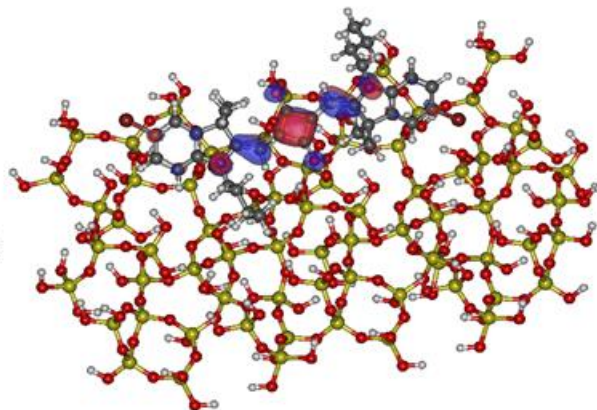

LUMO

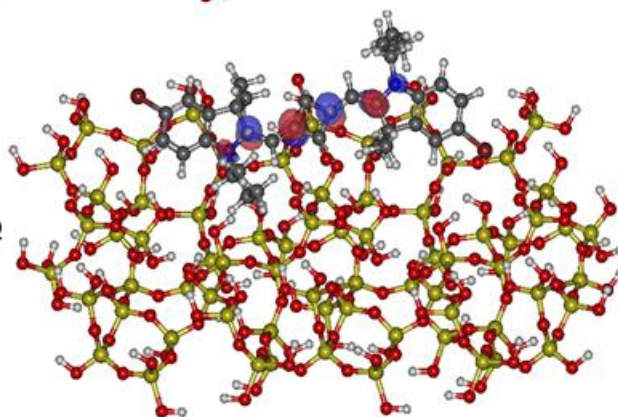

**Figure S3** Models of Br-NH (**A**), Br-C2 (**B**) and Br-C4 (**C**) adsorbed on silica surface

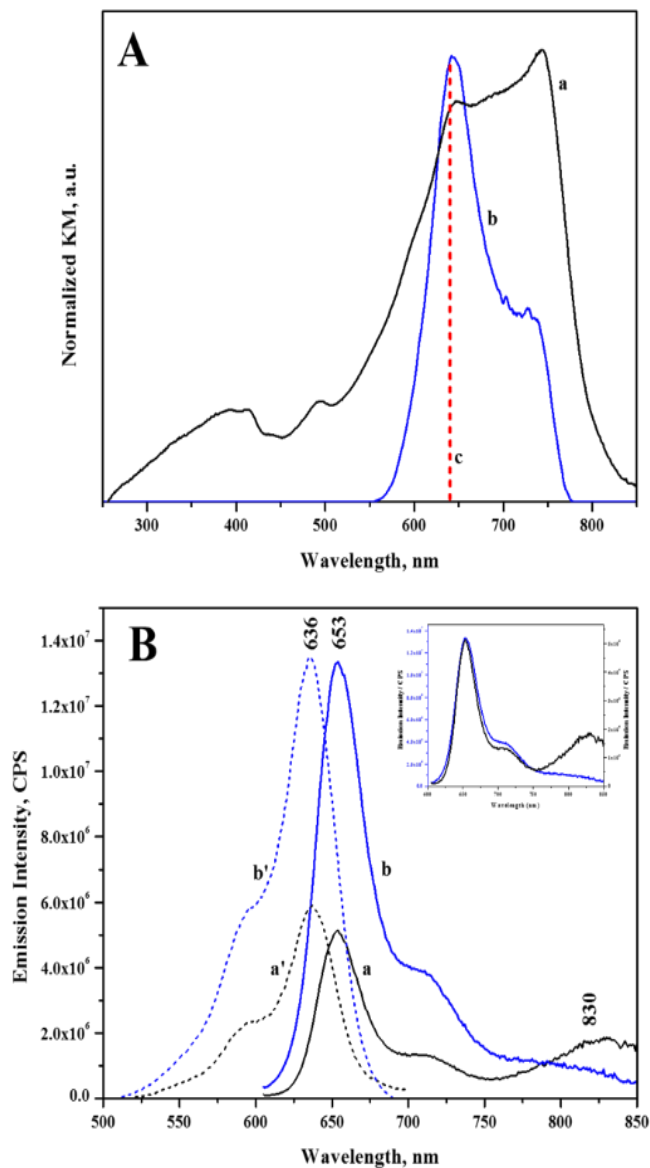

**Figure S4. A.** DR-UV-Vis spectra of the as prepared Br-NH/MSN hybrid (a, black curve), washed Br-NH/MSN (b, blue curve) and simulated absorption (c, red dashed line). **B.** Emission (solid curves) and excitation (dashed curves) spectra of the as prepared (a, a', black curves) and washed (b, b', blue curves) Br-NH/MSNs. The emission spectra are reported in the inset with normalized y scales for the sake of comparison.

DR-UV-Vis spectrum of the as-prepared sample is dominated by a signal at ca. 730 nm which intensity decreased significantly after the washing procedure. In parallel, the intensity of the large emission band at 830 nm decreased after the washing procedure. Noticeably, the overall emission intensity of the washed sample is about thrice the emission of the as-prepared sample, suggesting that the washing procedure lead to both the removal of most of the aggregated squaraine molecules and a re-distribution of the dyes, leading to a beneficial effect on the emission properties
